# Supplementary material for: Surgical selection criteria compliance is associated with a lower risk of periprosthetic joint infection in total hip arthroplasty
Source: PubMed Central journal article supplement — Arthroplast Today. 2019 Nov 30;5(4):521–4. doi: 10.1016/j.artd.2019.10.007 (PMC6921180; doi:10.1016/j.artd.2019.10.007), 2019-11-30
Supplement: mmc2.pdf [file mmc2.pdf]

# INDIVIDUAL CONFLICT OF INTEREST STATEMENT

## *American Association of Hip and Knee Surgeons*

(Adopted from the American Academy of Orthopaedic Surgeons disclosure statement)

The following form **must be filled out completely and submitted by each author (example, 6 authors, 6 forms).**  
**All items require a response. If there is no relevant disclosure for a given item, enter "None."**

**Manuscript Title** Surgical Selection Criteria Compliance is Associated with a Lower Risk of Periprosthetic Joint Infection in Total Hip Arthroplasty

---

1. Royalties from a company or supplier (The following conflicts were disclosed) *None*
2. Speakers bureau/paid presentations for a company or supplier (The following conflicts were disclosed)  
*None*
- 3A. Paid employee for a company or supplier (The following conflicts were disclosed)  
*Sage Publications Journal Editor*
- 3B. Paid consultant for a company or supplier (The following conflicts were disclosed)  
*None*
- 3C. Unpaid consultants for a company or supplier (The following conflicts were disclosed)  
*None*
4. Stock or stock options in a company or supplier (The following conflicts were disclosed)  
*None*
5. Research support from a company or supplier as a Principal Investigator (The following conflicts were disclosed)  
*None*
6. Other financial or material support from a company or supplier (The following conflicts were disclosed)  
*None*
7. Royalties, financial or material support from publishers (The following conflicts were disclosed)  
*None*
8. Medical/Orthopaedic publications editorial/governing board (The following conflicts were disclosed)  
*Geriatric Orthopaedic Surgery and Rehab.*
9. Board member/committee appointments for a society (The following conflicts were disclosed)  
*Own The Bone AOA*

**Each author must sign AND print or type his/her name, date and submit a separate form**

In addition, one BLINDED Conflict of Interest form (no author names used) should be submitted per manuscript with all author disclosures.

Stephen L. Kates, MD

04/25/19

Author Name (Print or Type)

Author Signature

Date
